# Supplementary material for: [Sn3OF]PO4vs. [Sn3F3]PO4: enhancing birefringence by breaking the R3 symmetry and realigning lone pairs
Source: Royal Society of Chemistry journal article supplement (doi:10.1039/d4qi01203h), 2024-01-01
Supplement: d4qi01203h1.pdf [file d4qi01203h1.pdf]

## Electronic Supplementary Information

### **[Sn<sub>3</sub>OF]PO<sub>4</sub> vs [Sn<sub>3</sub>F<sub>3</sub>]PO<sub>4</sub>: Enhancing Birefringence through Breaking *R*3 Symmetry and Realigning Lone Pairs**

Yuhan Hu<sup>a,b</sup>, Xi Xu<sup>a</sup>, Ruixi Wang<sup>a</sup>, Shunsong Zhang<sup>a</sup>, Jingyun Han<sup>a</sup>, Shuhui Zhan<sup>a</sup>, Jingyu Guo<sup>a,b\*</sup>, Li-ming Wu<sup>a,b\*</sup> and Ling Chen<sup>a,b\*</sup>

<sup>a</sup>Center for Advanced Materials Research, Beijing Normal University, Zhuhai 519087, People's Republic of China

<sup>b</sup>Beijing Key Laboratory of Energy Conversion and Storage Materials, College of Chemistry, Beijing Normal University, Beijing, 100875, People's Republic of China

\* Corresponding author: jyguo@bnu.edu.cn; wlm@bnu.edu.cn; chenl@bnu.edu.cn

## Table of Contents

---

|                                                                                                                                                                                                            | <b>Page</b> |
|------------------------------------------------------------------------------------------------------------------------------------------------------------------------------------------------------------|-------------|
| <b>Supplementary Experimental Section</b>                                                                                                                                                                  | S3          |
| <b>Table S1.</b> Crystal data and structure refinement for [Sn <sub>3</sub> OF]PO <sub>4</sub> and [Sn <sub>3</sub> F <sub>3</sub> ]PO <sub>4</sub> .                                                      | S4          |
| <b>Table S2.</b> Selected bond lengths [Å] and angles [deg] for [Sn <sub>3</sub> OF]PO <sub>4</sub> and [Sn <sub>3</sub> F <sub>3</sub> ]PO <sub>4</sub> .                                                 | S5          |
| <b>Table S3.</b> Atomic coordinates, equivalent isotropic displacement parameter and bond valence sum (BVS) for [Sn <sub>3</sub> OF]PO <sub>4</sub> and [Sn <sub>3</sub> F <sub>3</sub> ]PO <sub>4</sub> . | S6          |
| <b>Table S4.</b> Calculation detail of the contribution for [Sn <sub>3</sub> OF]PO <sub>4</sub> and [Sn <sub>3</sub> F <sub>3</sub> ]PO <sub>4</sub> .                                                     | S7          |
| <b>Table S5.</b> Calculation detail of the assessment of consistency arrangement for [Sn <sub>3</sub> OF]PO <sub>4</sub> and [Sn <sub>3</sub> F <sub>3</sub> ]PO <sub>4</sub> .                            | S8          |
| <b>Figure S1.</b> The XRD powder refined pattern of [Sn <sub>3</sub> OF]PO <sub>4</sub> and [Sn <sub>3</sub> F <sub>3</sub> ]PO <sub>4</sub> .                                                             | S9          |
| <b>Figure S2.</b> P-O band length in [PO <sub>4</sub> ] <sup>3-</sup> .                                                                                                                                    | S10         |
| <b>Figure S3.</b> Experimental band gap and UV-VIS diffuse reflection spectrum [Sn <sub>3</sub> OF]PO <sub>4</sub> and [Sn <sub>3</sub> F <sub>3</sub> ]PO <sub>4</sub> .                                  | S11         |
| <b>Figure S4.</b> The IR spectrum [Sn <sub>3</sub> OF]PO <sub>4</sub> and [Sn <sub>3</sub> F <sub>3</sub> ]PO <sub>4</sub> .                                                                               | S12         |
| <b>Figure S5.</b> Powder SHG response of [Sn <sub>3</sub> F <sub>3</sub> ]PO <sub>4</sub> .                                                                                                                | S13         |
| <b>Figure S6.</b> The EDS patterns of [Sn <sub>3</sub> OF]PO <sub>4</sub> and [Sn <sub>3</sub> F <sub>3</sub> ]PO <sub>4</sub> .                                                                           | S14         |
| <b>Figure S7.</b> The TG-DSC of [Sn <sub>3</sub> OF]PO <sub>4</sub> and [Sn <sub>3</sub> F <sub>3</sub> ]PO <sub>4</sub> .                                                                                 | S15         |
| <b>Figure S8.</b> The crystals of [Sn <sub>3</sub> OF]PO <sub>4</sub> and [Sn <sub>3</sub> F <sub>3</sub> ]PO <sub>4</sub> .                                                                               | S16         |
| <b>Figure S9.</b> NaSn <sub>4</sub> (PO <sub>4</sub> ) <sub>3</sub> viewed in the <i>ab</i> plane and the [001] projection of the symmetry elements of space group <i>R3c</i> .                            | S17         |
| <b>Figure S10.</b> Calculated band gap of [Sn <sub>3</sub> OF]PO <sub>4</sub> and [Sn <sub>3</sub> F <sub>3</sub> ]PO <sub>4</sub> .                                                                       | S18         |
| <b>Reference</b>                                                                                                                                                                                           | S19         |

---

## **Supplementary Experimental Section**

### **Synthesis of $[\text{Sn}_3\text{F}_3]\text{PO}_4$**

The reagents including  $\text{SnF}_2$  (Bldepham, 99 %) and  $\text{H}_3\text{PO}_4$  (Aladdin, 99 %) were used as purchased. The crystal and polycrystalline powders of  $[\text{Sn}_3\text{F}_3]\text{PO}_4$  was obtained in an aqueous solution<sup>1</sup>: 7.05g  $\text{SnF}_2$  are dissolved in 40 ml deionized water at 40 °C. The clear solution (previously filtered if some turbidity is present) is heated up to 50 °C and 15 ml  $\text{H}_3\text{PO}_4$  (1mol/L) is added dropwise under continuous stirring. The colourless block-like  $[\text{Sn}_3\text{F}_3]\text{PO}_4$  microcrystalline is filtered from the yet warm solution, washed with a small amount of deionized water and ethanol, finally dried at 70 °C during 12 h, and the yield of  $[\text{Sn}_3\text{F}_3]\text{PO}_4$  product is 100% without impurity.

### **Electron Dispersive Spectroscopy**

$[\text{Sn}_3\text{OF}]\text{PO}_4$  and  $[\text{Sn}_3\text{F}_3]\text{PO}_4$  crystals surfaces were characterized by electron dispersive spectroscopy (EDS) using a JMS-7610FPlus scanning electron microscope (SEM), equipped with an Oxford X-MasN EDS detector with a 20 mm<sup>2</sup> window, operated with an accelerating voltage of 20 kV and a working distance of 10 mm.

### **Second Harmonic Generation Response**

Powder SHG was measured using the Kurtz and Perry method<sup>2</sup> with Q-switched Nd: YAG lasers at wavelengths of 1064 nm. Polycrystalline  $[\text{Sn}_3\text{F}_3]\text{PO}_4$  samples were ground and sieved into a series of distinct size ranges, namely, 30–45, 45–75, 75–109, 109–150, and 150–212  $\mu\text{m}$ , and KDP sieved into the same size ranges were used as references.

**Table S1.** Crystal data and structure refinement for [Sn<sub>3</sub>OF]PO<sub>4</sub> and [Sn<sub>3</sub>F<sub>3</sub>]PO<sub>4</sub>.

| Empirical formula                                                 | [Sn <sub>3</sub> OF]PO <sub>4</sub>                                                                                                         | [Sn <sub>3</sub> F <sub>3</sub> ]PO <sub>4</sub>                                                                                      | [Sn <sub>3</sub> F <sub>3</sub> ]PO <sub>4</sub> <sup>#1</sup>                                                                          |
|-------------------------------------------------------------------|---------------------------------------------------------------------------------------------------------------------------------------------|---------------------------------------------------------------------------------------------------------------------------------------|-----------------------------------------------------------------------------------------------------------------------------------------|
| Formula weight                                                    | 486.04                                                                                                                                      | 508.04                                                                                                                                | 508.04                                                                                                                                  |
| Temperature                                                       | 300.0 K                                                                                                                                     | 302.0 K                                                                                                                               | 100 K                                                                                                                                   |
| Wavelength                                                        | 0.71073 Å                                                                                                                                   | 0.71073 Å                                                                                                                             | 0.71073 Å                                                                                                                               |
| Crystal system                                                    | Monoclinic                                                                                                                                  | Trigonal                                                                                                                              | Trigonal                                                                                                                                |
| Space group                                                       | <i>P</i> 2 <sub>1</sub> / <i>c</i>                                                                                                          | <i>R</i> 3                                                                                                                            | <i>R</i> 3                                                                                                                              |
| Unit cell dimensions                                              | <i>a</i> = 4.8865(2) Å<br><i>b</i> = 11.4484(5) Å<br><i>c</i> = 11.9947(5) Å<br><i>α</i> = 90 °<br><i>β</i> = 97.286(1) °<br><i>γ</i> = 90° | <i>a</i> = 11.8537(3) Å<br><i>b</i> = 11.8537(3) Å<br><i>c</i> = 4.6271(2) Å<br><i>α</i> = 90 °<br><i>β</i> = 90 °<br><i>γ</i> = 120° | <i>a</i> = 11.8096(4) Å<br><i>b</i> = 11.8096(4) Å<br><i>c</i> = 4.65010(10) Å<br><i>α</i> = 90 °<br><i>β</i> = 90 °<br><i>γ</i> = 120° |
| Volume                                                            | 665.60(5) Å <sup>3</sup>                                                                                                                    | 563.05(4) Å <sup>3</sup>                                                                                                              | 561.65(3) Å <sup>3</sup>                                                                                                                |
| <i>Z</i>                                                          | 4                                                                                                                                           | 3                                                                                                                                     | 3                                                                                                                                       |
| Density (calculated)                                              | 4.850 g/cm <sup>3</sup>                                                                                                                     | 4.495 g/cm <sup>3</sup>                                                                                                               | 4.506 g/cm <sup>3</sup>                                                                                                                 |
| Absorption coefficient                                            | 11.391                                                                                                                                      | 10.136 mm <sup>-1</sup>                                                                                                               | 10.162 mm <sup>-1</sup>                                                                                                                 |
| F(000)                                                            | 856.0                                                                                                                                       | 672.0                                                                                                                                 |                                                                                                                                         |
| Radiation                                                         | Mo Kα (λ = 0.71073 Å)                                                                                                                       | Mo Kα (λ = 0.71073 Å)                                                                                                                 | Mo Kα (λ = 0.71073 Å)                                                                                                                   |
| Theta range for data collection                                   | 4.938 to 55.08 °                                                                                                                            | 6.874 to 54.832 °                                                                                                                     |                                                                                                                                         |
| Index ranges                                                      | -6 ≤ <i>h</i> ≤ 6, -14 ≤ <i>k</i> ≤ 14, -15 ≤ <i>l</i> ≤ 15                                                                                 | -15 ≤ <i>h</i> ≤ 15, -15 ≤ <i>k</i> ≤ 15, -5 ≤ <i>l</i> ≤ 5                                                                           |                                                                                                                                         |
| Reflections collected                                             | 12626                                                                                                                                       | 3648                                                                                                                                  | 13174                                                                                                                                   |
| Independent reflections                                           | 1480 [ <i>R</i> ( <i>int</i> ) = 0.0298, <i>R</i> ( <i>sigma</i> ) = 0.0155]                                                                | 575 [ <i>R</i> ( <i>int</i> ) = 0.0613, <i>R</i> ( <i>sigma</i> ) = 0.0321]                                                           | 739 [ <i>R</i> ( <i>int</i> ) = 0.0283, <i>R</i> ( <i>sigma</i> ) = 0.0106]                                                             |
| Completeness to theta                                             | 96.2 % (27.54 °)                                                                                                                            | 100.00 % (27.416 °)                                                                                                                   |                                                                                                                                         |
| Refinement method                                                 | Full-matrix least-squares on <i>F</i> <sub>o</sub> <sup>2</sup>                                                                             | Full-matrix least-squares on <i>F</i> <sub>o</sub> <sup>2</sup>                                                                       |                                                                                                                                         |
| Goodness-of-fit on <i>F</i> <sub>o</sub> <sup>2</sup>             | 1.184                                                                                                                                       | 1.076                                                                                                                                 | 1.225                                                                                                                                   |
| Final <i>R</i> indices [ <i>I</i> > 2σ( <i>I</i> )] <sup>#2</sup> | <i>R</i> <sub>1</sub> = 0.0177, <i>wR</i> <sub>2</sub> = 0.0366                                                                             | <i>R</i> <sub>1</sub> = 0.0178, <i>wR</i> <sub>2</sub> = 0.0398                                                                       | <i>R</i> <sub>1</sub> = 0.0095, <i>wR</i> <sub>2</sub> = 0.0235                                                                         |
| <i>R</i> indices (all data)                                       | <i>R</i> <sub>1</sub> = 0.0184, <i>wR</i> <sub>2</sub> = 0.0369                                                                             | <i>R</i> <sub>1</sub> = 0.0186, <i>wR</i> <sub>2</sub> = 0.0405                                                                       | <i>R</i> <sub>1</sub> = 0.0095, <i>wR</i> <sub>2</sub> = 0.025                                                                          |
| Largest diff. peak and hole                                       | 0.59 and -0.54 e/Å <sup>3</sup>                                                                                                             | 0.52 and -0.55 e/Å <sup>3</sup>                                                                                                       | 0.514 and -0.464 e/Å <sup>3</sup>                                                                                                       |

<sup>#1</sup> This crystal data was reported by E. Uglova. (E. Uglova, M. Reichelt, H. Reuter, Formation and structural characterization of the basic tin(II) fluoride, Sn<sub>9</sub>F<sub>13</sub>O(OH)<sub>3</sub>·2H<sub>2</sub>O, containing the unprecedented [Sn<sub>4</sub>O(OH)<sub>3</sub>]<sup>3+</sup> cage-ion, *Z. Anorg. Allg. Chem.* 2022, 648, e202200302.)

<sup>#2</sup> *R*<sub>1</sub> = Σ||*F*<sub>o</sub> - |*F*<sub>c</sub>||/Σ|*F*<sub>o</sub>| and *wR*<sub>2</sub> = [Σ*w*(*F*<sub>o</sub><sup>2</sup> - *F*<sub>c</sub><sup>2</sup>)<sup>2</sup> / Σ*wF*<sub>o</sub><sup>4</sup>]<sup>1/2</sup> for *F*<sub>o</sub><sup>2</sup> > 2σ(*F*<sub>o</sub><sup>2</sup>)

**Table S2.** Selected bond lengths [Å] and angles [deg] for [Sn<sub>3</sub>OF]PO<sub>4</sub> and [Sn<sub>3</sub>F<sub>3</sub>]PO<sub>4</sub>.

| [Sn <sub>3</sub> OF]PO <sub>4</sub>              |            |                                             |              |
|--------------------------------------------------|------------|---------------------------------------------|--------------|
| Sn(1)-O(2) <sup>#1</sup>                         | 2.156(3) Å | Sn(3)-F(1)                                  | 2.260(2) Å   |
| Sn(1)-O(4)                                       | 2.141(3) Å | P(1)-O(1)                                   | 1.559(3) Å   |
| Sn(1)-O(5)                                       | 2.115(2) Å | P(1)-O(2)                                   | 1.541(3) Å   |
| Sn(1)-F(1) <sup>#2</sup>                         | 2.678(2) Å | P(1)-O(3)                                   | 1.532(3) Å   |
| Sn(2)-O(1) <sup>#3</sup>                         | 2.461(3) Å | P(1)-O(4)                                   | 1.534(3) Å   |
| Sn(2)-O(1) <sup>#4</sup>                         | 2.168(2) Å | O(2)-P(1)-O(1)                              | 109.35(15) ° |
| Sn(2)-O(5)                                       | 2.066(2) Å | O(3)-P(1)-O(1)                              | 106.52(14) ° |
| Sn(2)-F(1)                                       | 2.283(2) Å | O(3)-P(1)-O(2)                              | 109.66(15) ° |
| Sn(3)-O(3)                                       | 2.173(2) Å | O(3)-P(1)-O(4)                              | 112.71(15) ° |
| Sn(3)-O(5)                                       | 2.075(3) Å | O(4)-P(1)-O(1)                              | 108.02(15) ° |
| Sn(3)-O(2) <sup>#1</sup>                         | 2.740(3) Å | O(4)-P(1)-O(2)                              | 110.45(16) ° |
| [Sn <sub>3</sub> F <sub>3</sub> ]PO <sub>4</sub> |            |                                             |              |
| Sn(1)-O(1)                                       | 2.098(6) Å | P(1)-O(2)                                   | 1.556(10) Å  |
| Sn(1)-O(2) <sup>#5</sup>                         | 2.567(6) Å | O(1) <sup>#7</sup> -P(1)-O(1) <sup>#8</sup> | 111.5(2) °   |
| Sn(1)-F(1)                                       | 2.058(5) Å | O(1)-P(1)-O(1) <sup>#8</sup>                | 111.5(2) °   |
| Sn(1)-F(1) <sup>#6</sup>                         | 2.264(5) Å | O(1) <sup>#7</sup> -P(1)-O(2)               | 107.4(2) °   |
| P(1)-O(1)                                        | 1.523(6) Å | O(1)-P(1)-O(2)                              | 107.4(2) °   |
| P(1)-O(1) <sup>#7</sup>                          | 1.523(6) Å | O(1) <sup>#8</sup> -P(1)-O(2)               | 107.4(2) °   |
| P(1)-O(1) <sup>#8</sup>                          | 1.523(6) Å |                                             |              |

Symmetry transformations used to generate equivalent atoms:

<sup>#1</sup> 1+x, y, z; <sup>#2</sup> 1/2+x, 3/2-y, -1/2+z; <sup>#3</sup> 3/2-x, 1/2+y, 1/2-z; <sup>#4</sup> 1/2+x, 3/2-y, 1/2+z; <sup>#5</sup> x, y, -1+z; <sup>#6</sup> 5/3-y, 1/3+x-y, 1/3+z; <sup>#7</sup> 1+y-x, 1-x, +z; <sup>#8</sup> 1-y, +x-y, +z

**Table S3.** Atomic coordinates, Wyckoff positions, equivalent isotropic displacement parameter and bond valence sum (BVS) for [Sn<sub>3</sub>OF]PO<sub>4</sub> and [Sn<sub>3</sub>F<sub>3</sub>]PO<sub>4</sub>.

|                                                  | Atom  | Wyckoff | x          | y         | z          | U <sub>eq</sub> <sup>#1</sup> | BVS <sup>#2</sup> |
|--------------------------------------------------|-------|---------|------------|-----------|------------|-------------------------------|-------------------|
| [Sn <sub>3</sub> OF]PO <sub>4</sub>              | Sn(1) | 4e      | 11223.1(5) | 8608.1(2) | 2015.0(2)  | 15.65(8)                      | 2.118             |
|                                                  | Sn(2) | 4e      | 7189.7(5)  | 8965.3(2) | 4388.9(2)  | 16.24(8)                      | 2.063             |
|                                                  | Sn(3) | 4e      | 10904.9(5) | 6423.0(2) | 4136.3(2)  | 18.64(8)                      | 1.993             |
|                                                  | P(1)  | 4e      | 6165.6(17) | 6568.4(8) | 1861.4(7)  | 12.17(17)                     | 4.918             |
|                                                  | O(1)  | 4e      | 5074(5)    | 5723(2)   | 887(2)     | 17.9(5)                       | 2.053             |
|                                                  | O(2)  | 4e      | 3707(5)    | 7069(2)   | 2395(2)    | 20.4(5)                       | 1.984             |
|                                                  | O(3)  | 4e      | 7985(5)    | 5836(2)   | 2731(2)    | 17.7(5)                       | 1.867             |
|                                                  | O(4)  | 4e      | 7765(5)    | 7554(2)   | 1366(2)    | 21.1(5)                       | 1.985             |
|                                                  | O(5)  | 4e      | 10202(5)   | 8137(2)   | 3616(2)    | 17.2(5)                       | 2.287             |
|                                                  | F(1)  | 4e      | 7309(5)    | 7068(2)   | 4979.1(19) | 22.9(5)                       | 0.915             |
| [Sn <sub>3</sub> F <sub>3</sub> ]PO <sub>4</sub> | Sn(1) | 9b      | 9052.0(5)  | 4506.6(6) | 1048(3)    | 20.65(17)                     | 2.114             |
|                                                  | P(1)  | 3a      | 6666.67    | 3333.33   | 6015(7)    | 15.0(7)                       | 5.042             |
|                                                  | O(1)  | 9b      | 8081(6)    | 4103(8)   | 5033(12)   | 28.2(15)                      | 2.096             |
|                                                  | O(2)  | 3a      | 6666.67    | 3333.33   | 9380(20)   | 21(2)                         | 1.796             |
|                                                  | F(1)  | 9b      | 8669(6)    | 6010(5)   | 578(13)    | 39.2(15)                      | 1.102             |

<sup>#1</sup> U<sub>eq</sub> is defined as one-third of the trace of the orthogonalized U<sub>ij</sub> tensor.

<sup>#2</sup> Bond valence sums are calculated by using bond-valence theory ( $S_i = \exp[(R_o - R_i)/B]$ , where  $R_o$  is an empirical constant,  $R_i$  is the length of bond I (in angstroms), and  $B = 0.37$ ).

**Table S4.** Calculation detail of the contribution for [Sn<sub>3</sub>OF]PO<sub>4</sub> and [Sn<sub>3</sub>F<sub>3</sub>]PO<sub>4</sub>.

|                                                  | Sn-centered Polyhedron in unit cell                | Coordinate |       |       | Projected value( $n_x$ ) | Projected value( $n_y$ ) | Projected value( $n_z$ ) | Contribution of $n_x$                 | Contribution of $n_y$                                              | Contribution of $n_z$ |
|--------------------------------------------------|----------------------------------------------------|------------|-------|-------|--------------------------|--------------------------|--------------------------|---------------------------------------|--------------------------------------------------------------------|-----------------------|
| [Sn <sub>3</sub> OF]PO <sub>4</sub>              | 1#[Sn(1)O <sub>3</sub> F] <sup>5-</sup>            | -0.14      | 0.12  | -0.86 | 0.14                     | 0.12                     | 0.86                     | 2.80                                  | 6.16                                                               | 6.24                  |
|                                                  | 2#[Sn(1)O <sub>3</sub> F] <sup>5-</sup>            | -0.14      | 0.12  | 0.86  | 0.14                     | 0.12                     | 0.86                     |                                       |                                                                    |                       |
|                                                  | 3#[Sn(1)O <sub>3</sub> F] <sup>5-</sup>            | 0.14       | -0.12 | -0.86 | 0.14                     | 0.12                     | 0.86                     |                                       |                                                                    |                       |
|                                                  | 4#[Sn(1)O <sub>3</sub> F] <sup>5-</sup>            | 0.14       | -0.12 | 0.86  | 0.14                     | 0.12                     | 0.86                     |                                       |                                                                    |                       |
|                                                  | ΣProjected value(Sn(1))                            |            |       |       | 0.56                     | 0.48                     | 3.44                     |                                       |                                                                    |                       |
|                                                  | 5#[Sn(2)O <sub>3</sub> F] <sup>5-</sup>            | -0.04      | -0.86 | -0.15 | 0.04                     | 0.86                     | 0.15                     |                                       |                                                                    |                       |
|                                                  | 6#[Sn(2)O <sub>3</sub> F] <sup>5-</sup>            | -0.04      | -0.86 | 0.15  | 0.04                     | 0.86                     | 0.15                     |                                       |                                                                    |                       |
|                                                  | 7#[Sn(2)O <sub>3</sub> F] <sup>5-</sup>            | 0.04       | 0.86  | -0.15 | 0.04                     | 0.86                     | 0.15                     |                                       |                                                                    |                       |
|                                                  | 8#[Sn(2)O <sub>3</sub> F] <sup>5-</sup>            | 0.04       | 0.86  | 0.15  | 0.04                     | 0.86                     | 0.15                     |                                       |                                                                    |                       |
|                                                  | ΣProjected value(Sn(2))                            |            |       |       | 0.16                     | 3.44                     | 0.60                     |                                       |                                                                    |                       |
|                                                  | 9#[Sn(3)O <sub>3</sub> F] <sup>5-</sup>            | -0.52      | 0.56  | -0.55 | 0.52                     | 0.56                     | 0.55                     |                                       |                                                                    |                       |
|                                                  | 10#[Sn(3)O <sub>3</sub> F] <sup>5-</sup>           | -0.52      | 0.56  | 0.55  | 0.52                     | 0.56                     | 0.55                     |                                       |                                                                    |                       |
|                                                  | 11#[Sn(3)O <sub>3</sub> F] <sup>5-</sup>           | 0.52       | -0.56 | -0.55 | 0.52                     | 0.56                     | 0.55                     |                                       |                                                                    |                       |
|                                                  | 12#[Sn(3)O <sub>3</sub> F] <sup>5-</sup>           | 0.52       | -0.56 | 0.55  | 0.52                     | 0.56                     | 0.55                     |                                       |                                                                    |                       |
| ΣProjected value(Sn(3))                          |                                                    |            |       | 2.08  | 2.24                     | 2.20                     |                          |                                       |                                                                    |                       |
| ΣProjected value(Sn)                             |                                                    |            |       | 2.80  | 6.16                     | 6.24                     |                          |                                       |                                                                    |                       |
|                                                  | Sn-centered Polyhedron in unit cell                | Coordinate |       |       | Projected value( $n_a$ ) | Projected value( $n_b$ ) | Projected value( $n_c$ ) | Contribution of $n_{ac\text{-plane}}$ | Contribution of $n_{\text{perpendicular to the } ac\text{-plane}}$ |                       |
| [Sn <sub>3</sub> F <sub>3</sub> ]PO <sub>4</sub> | 1#[SnO <sub>2</sub> F <sub>2</sub> ] <sup>4-</sup> | 0.51       | -0.33 | -0.44 | 0.51                     | 0.33                     | 0.44                     | 5.46                                  | 4.29                                                               |                       |
|                                                  | 2#[SnO <sub>2</sub> F <sub>2</sub> ] <sup>4-</sup> | -0.84      | -0.51 | -0.44 | 0.84                     | 0.51                     | 0.44                     |                                       |                                                                    |                       |
|                                                  | 3#[SnO <sub>2</sub> F <sub>2</sub> ] <sup>4-</sup> | 0.33       | 0.84  | -0.44 | 0.33                     | 0.84                     | 0.44                     |                                       |                                                                    |                       |
|                                                  | 4#[SnO <sub>2</sub> F <sub>2</sub> ] <sup>4-</sup> | -0.84      | -0.51 | -0.44 | 0.84                     | 0.51                     | 0.44                     |                                       |                                                                    |                       |
|                                                  | 5#[SnO <sub>2</sub> F <sub>2</sub> ] <sup>4-</sup> | 0.33       | 0.84  | -0.44 | 0.33                     | 0.84                     | 0.44                     |                                       |                                                                    |                       |
|                                                  | 6#[SnO <sub>2</sub> F <sub>2</sub> ] <sup>4-</sup> | 0.51       | -0.33 | 0.44  | 0.51                     | 0.33                     | 0.44                     |                                       |                                                                    |                       |
|                                                  | 7#[SnO <sub>2</sub> F <sub>2</sub> ] <sup>4-</sup> | 0.42       | 1.05  | -0.55 | 0.42                     | 1.05                     | 0.55                     |                                       |                                                                    |                       |
|                                                  | 8#[SnO <sub>2</sub> F <sub>2</sub> ] <sup>4-</sup> | 0.63       | -0.42 | -0.55 | 0.63                     | 0.42                     | 0.55                     |                                       |                                                                    |                       |
|                                                  | 9#[SnO <sub>2</sub> F <sub>2</sub> ] <sup>4-</sup> | -1.05      | -0.63 | -0.55 | 1.05                     | 0.63                     | 0.55                     |                                       |                                                                    |                       |
|                                                  | ΣProjected value                                   |            |       |       | 5.46                     | 5.46                     | 4.29                     |                                       |                                                                    |                       |

**Table S5.** Calculation detail of the assessment of consistency arrangement for [Sn<sub>3</sub>OF]PO<sub>4</sub> and [Sn<sub>3</sub>F<sub>3</sub>]PO<sub>4</sub>.

|                                                  | $\theta_i$                                                                                                                            | $n$ | $\frac{\sum_i^n \cos\theta_i}{n}$ |
|--------------------------------------------------|---------------------------------------------------------------------------------------------------------------------------------------|-----|-----------------------------------|
| [Sn <sub>3</sub> OF]PO <sub>4</sub>              | 87.6 ° × 8<br>72.8 ° × 8<br>72.5 ° × 4<br>65.6 ° × 8<br>63.3 ° × 8<br>49.2 ° × 8<br>41.9 ° × 8<br>23.8 ° × 4<br>19.8 ° × 3<br>0 ° × 7 | 66  | 0.54                              |
|                                                  | $\theta_i$                                                                                                                            | $n$ | $\frac{\sum_i^n \cos\theta_i}{n}$ |
| [Sn <sub>3</sub> F <sub>3</sub> ]PO <sub>4</sub> | 61.8 ° × 27<br>0 ° × 9                                                                                                                | 36  | 0.47                              |



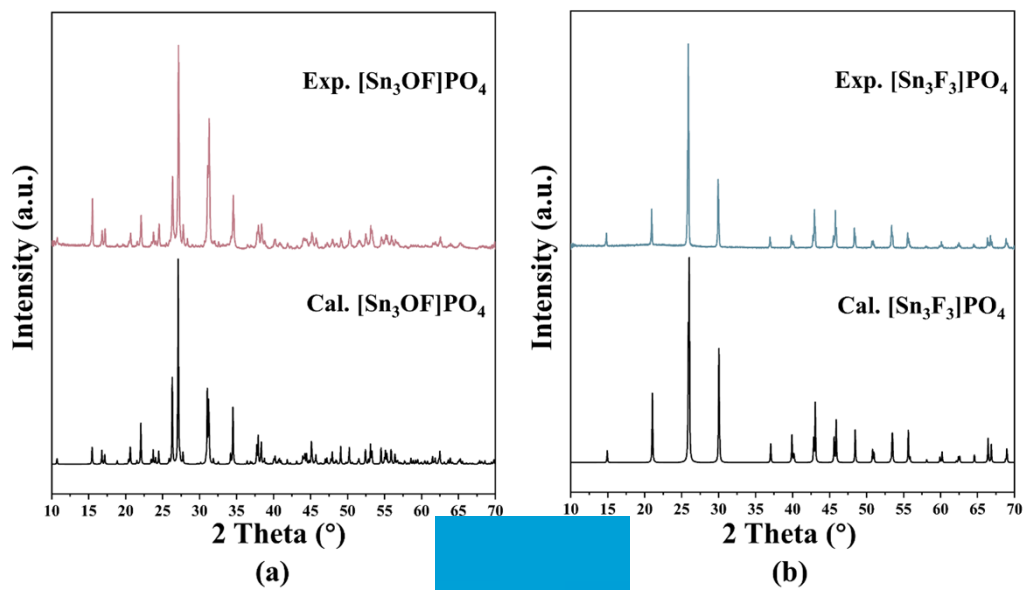

Figure S1. The XRD powder refined patterns of  $[\text{Sn}_3\text{OF}]\text{PO}_4$  and  $[\text{Sn}_3\text{F}_3]\text{PO}_4$ .

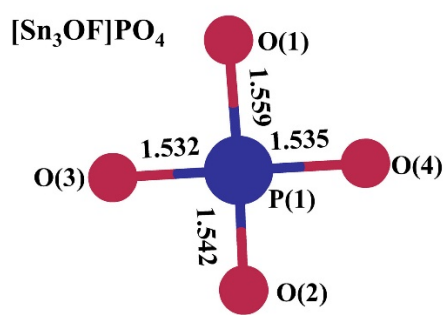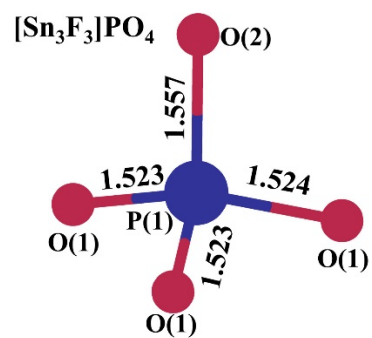

**Figure S2.** P-O bond length in  $[\text{PO}_4]^{3-}$ .

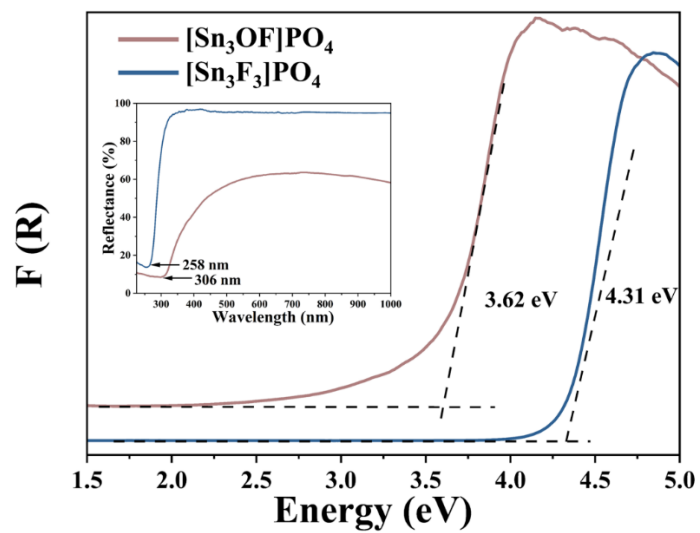

**Figure S3.** Experimental band gaps and UV-Vis diffuse reflection spectra of  $[\text{Sn}_3\text{OF}]\text{PO}_4$  and  $[\text{Sn}_3\text{F}_3]\text{PO}_4$ .

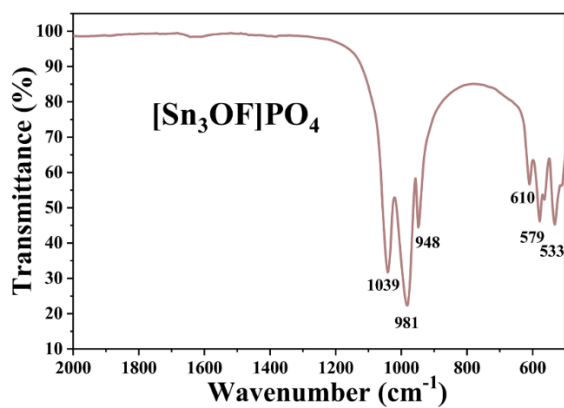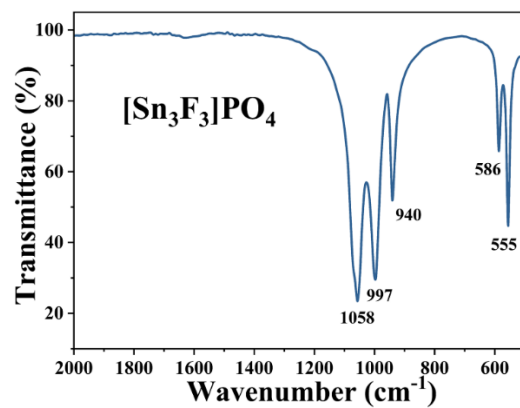

Figure S4. The IR spectra of  $[\text{Sn}_3\text{OF}]\text{PO}_4$  and  $[\text{Sn}_3\text{F}_3]\text{PO}_4$ .

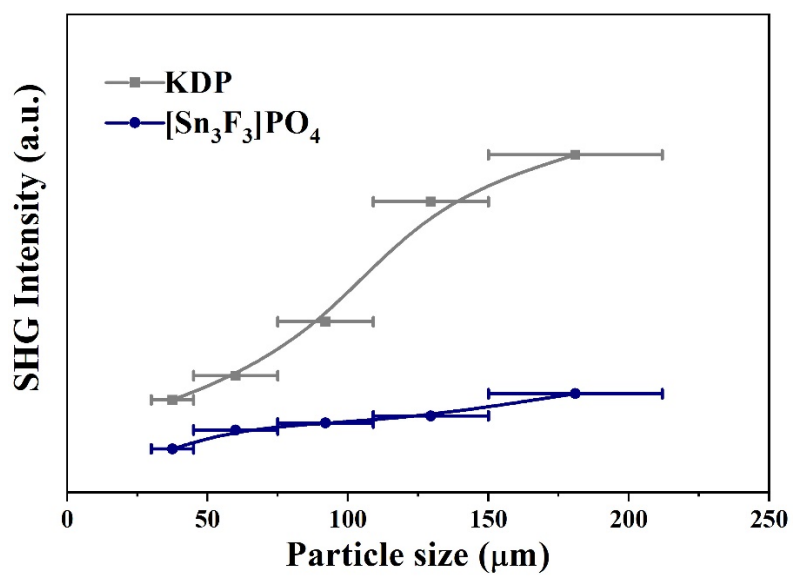

Figure S5. Powder SHG response of [Sn<sub>3</sub>F<sub>3</sub>]PO<sub>4</sub>.

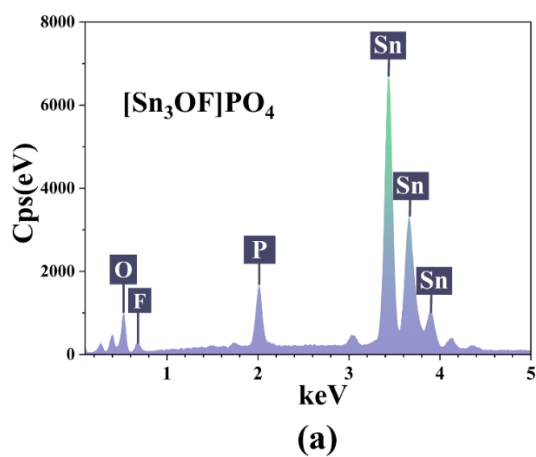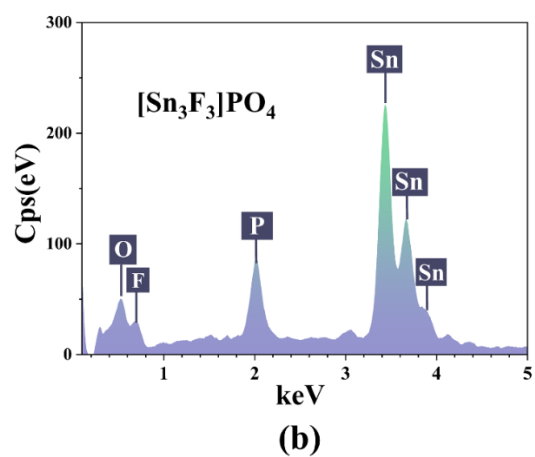

Figure S6. The EDS patterns of  $[\text{Sn}_3\text{OF}]\text{PO}_4$  and  $[\text{Sn}_3\text{F}_3]\text{PO}_4$ .

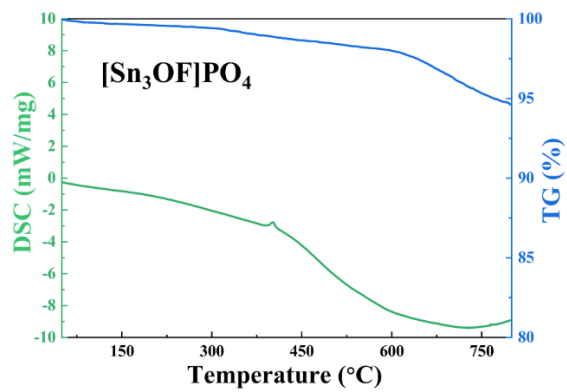

(a)

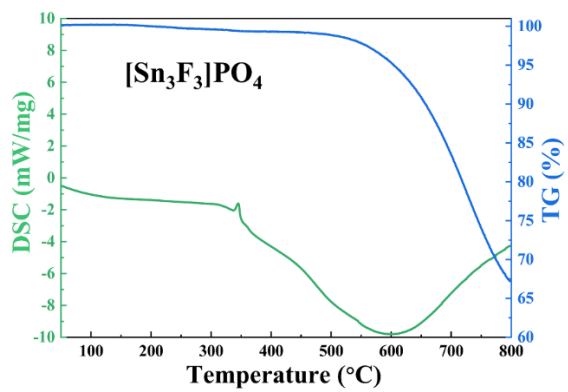

(b)

Figure S7. The TG-DSC of  $[\text{Sn}_3\text{OF}]\text{PO}_4$  and  $[\text{Sn}_3\text{F}_3]\text{PO}_4$ .

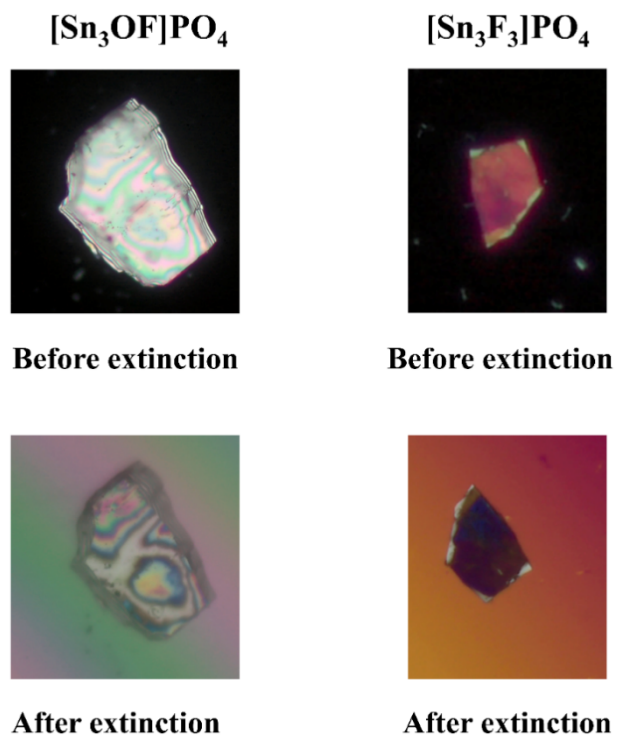

**Figure S8.** The crystals of  $[\text{Sn}_3\text{OF}]\text{PO}_4$  and  $[\text{Sn}_3\text{F}_3]\text{PO}_4$ .



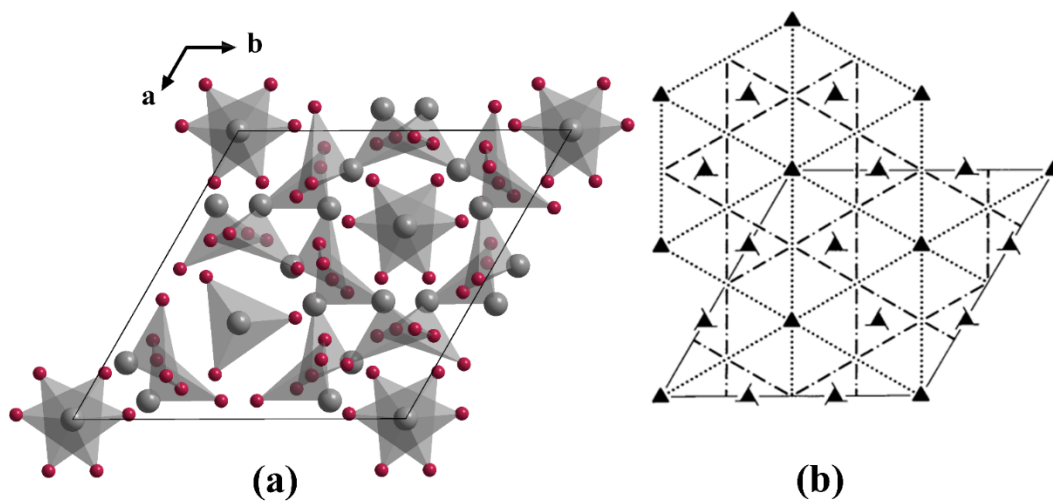

**Figure S9.**  $\text{NaSn}_4(\text{PO}_4)_3$  viewed in the  $ab$  plane and the [001] projection of the symmetry elements of space group  $R3c$ .

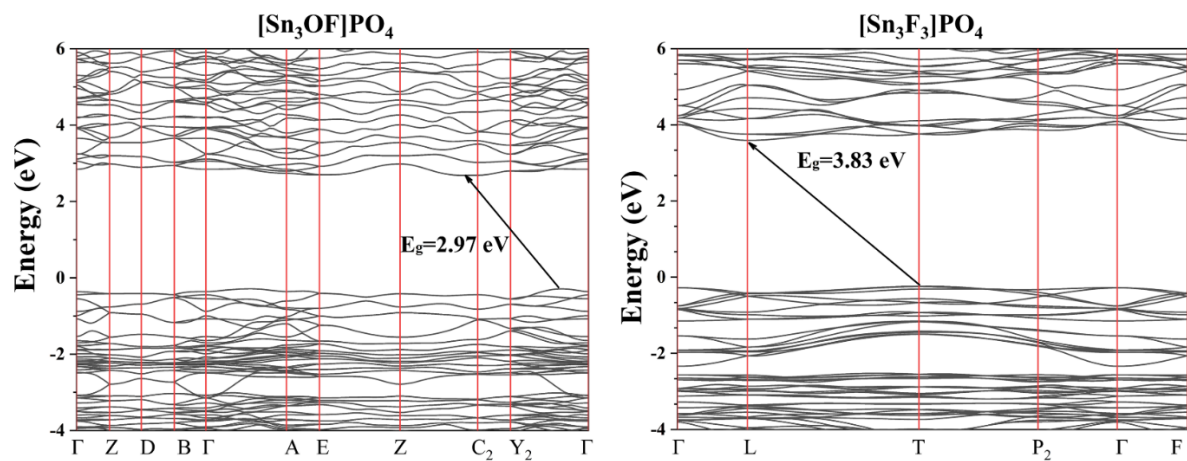

**Figure S10.** Calculated band gaps of  $[\text{Sn}_3\text{OF}]\text{PO}_4$  and  $[\text{Sn}_3\text{F}_3]\text{PO}_4$ .

**Reference**

- 1 S.B. Etcheverry, G.E. Narda, M.C. Apella, E.J. Baran, Hydrolytic Properties of  $\text{Sn}_3\text{PO}_4\text{F}_3$  (Short Communication), *Caries Res.*, 1986, **20**, 120–122.
- 2 S. K. Kurtz, T. T. Perry, A powder technique for the evaluation of nonlinear optical materials, *J. Appl. Phys.*, 1968, **39**, 3798–3813.
